# Supplementary material for: CO-free selective hydrogenation of CO 2 to value-added formate under low-temperature aqueous conditions using a heterogenized Ru-PNP catalyst
Source: Royal Society of Chemistry journal article supplement (doi:10.1039/d5dt01972a), 2025-01-01
Supplement: d5dt01972a1.pdf [file d5dt01972a1.pdf]

## Supplementary information

CO-Free Selective Hydrogenation of CO<sub>2</sub> to Value-Added Formate under Low-Temperature Aqueous Conditions Using a Heterogenized Ru-PNP Catalyst

Hongjin Park<sup>a</sup>, Minkyung Go<sup>a</sup> and Sungho Yoon<sup>a,\*</sup>

<sup>a</sup> Department of Chemistry, Chung- Ang University, 84 Heukseok-ro, Dongjak-gu, Seoul 06974, Republic of Korea. E-Mail: [sunghoyoon@cau.ac.kr](mailto:sunghoyoon@cau.ac.kr)

### Contents

Figure S1. Representative (a) HPLC, (b) & (c) <sup>1</sup>H & <sup>13</sup>C NMR spectra (d) GC chromatogram of the potassium formate (HCO<sub>2</sub>K) produced after CO<sub>2</sub> hydrogenation.

Figure S2. (a) Stainless-steel reactor employed for CO<sub>2</sub> hydrogenation. (b) Overall setup of the hydrogenation system using aqueous KOH, (c) Schematic illustration of the heterogeneous catalyst recycling procedure.

Table S1. Comparison of catalytic performance in KOH-mediated CO<sub>2</sub> hydrogenation.

Table S2. List of abbreviations.

Figure S1. Representative (a) HPLC, (b) & (c)  $^1\text{H}$  &  $^{13}\text{C}$  NMR spectra (d) GC chromatogram of the potassium formate ( $\text{HCO}_2\text{K}$ ) produced after  $\text{CO}_2$  hydrogenation.

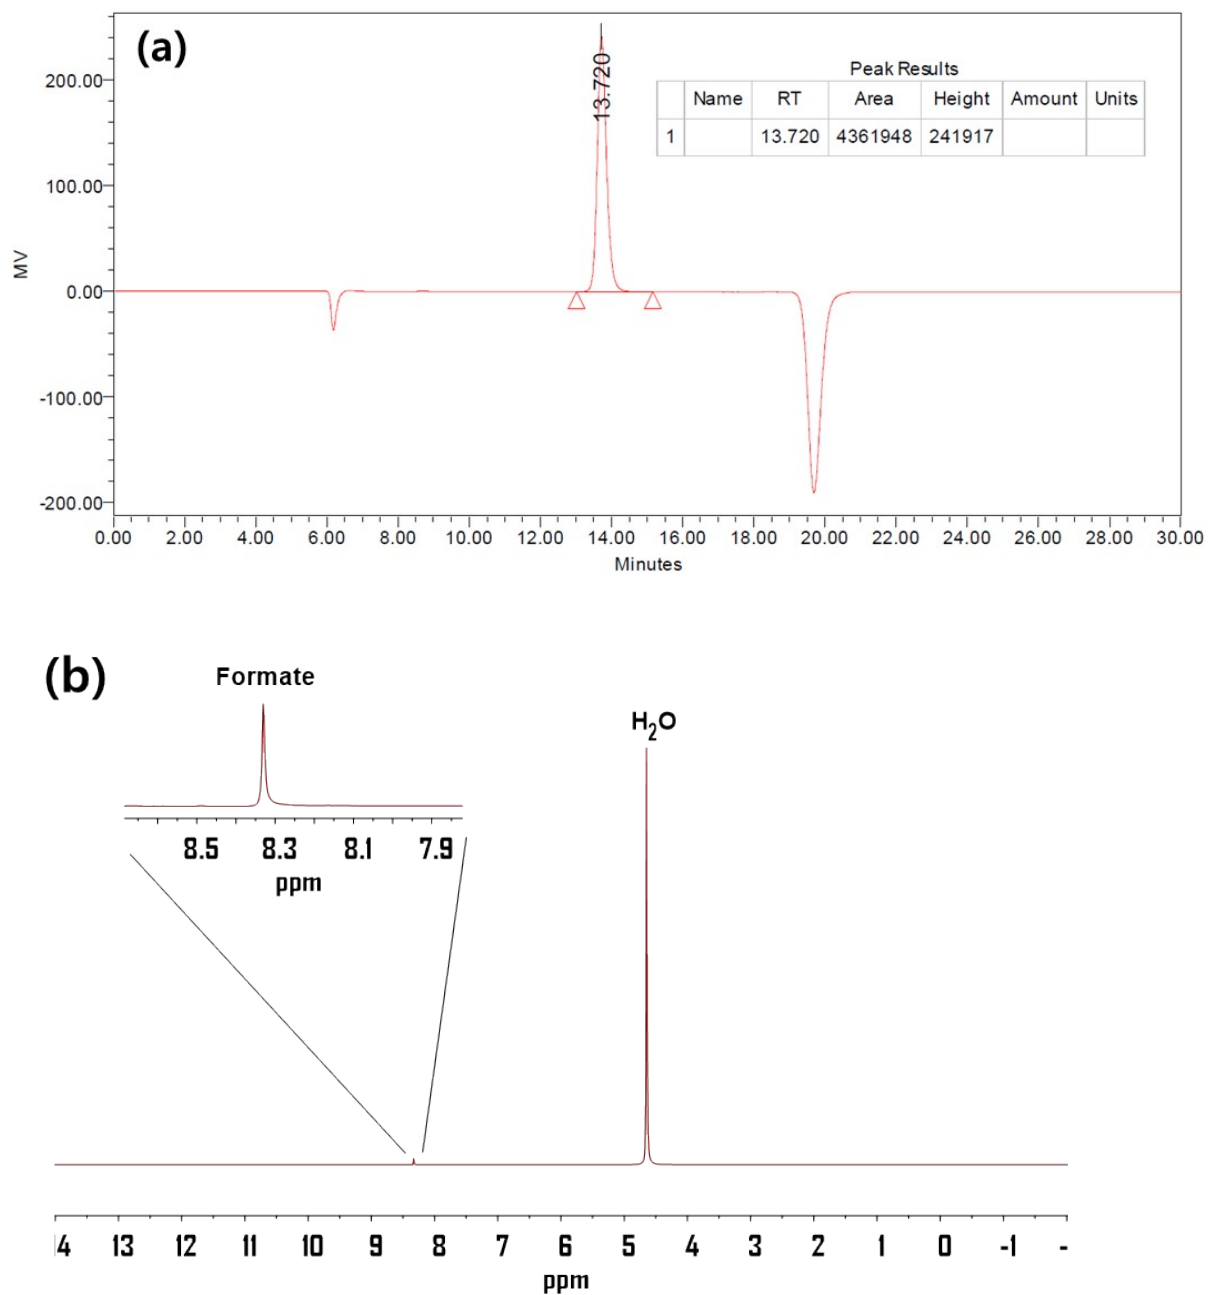

(c)

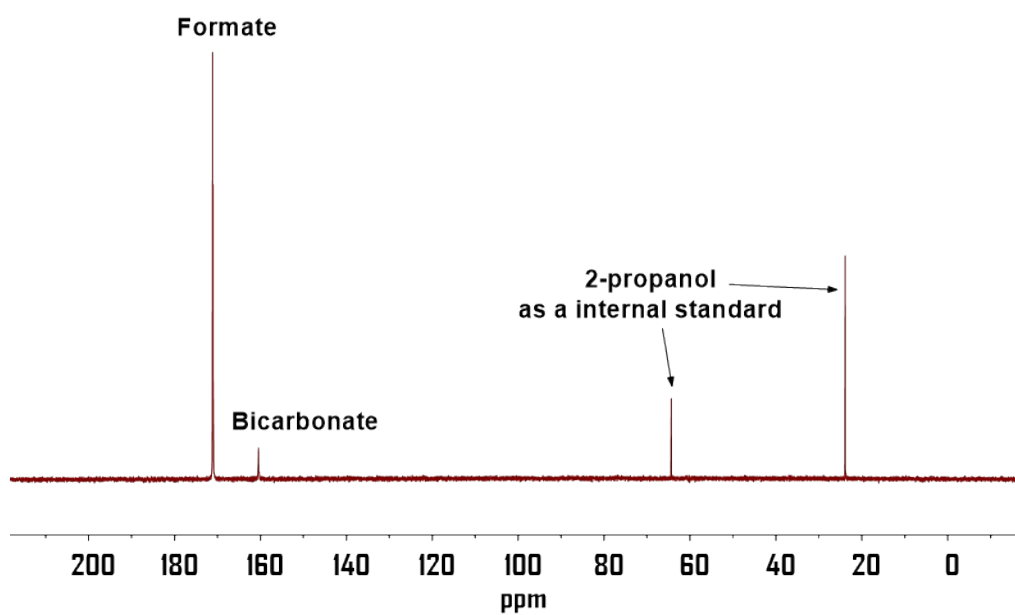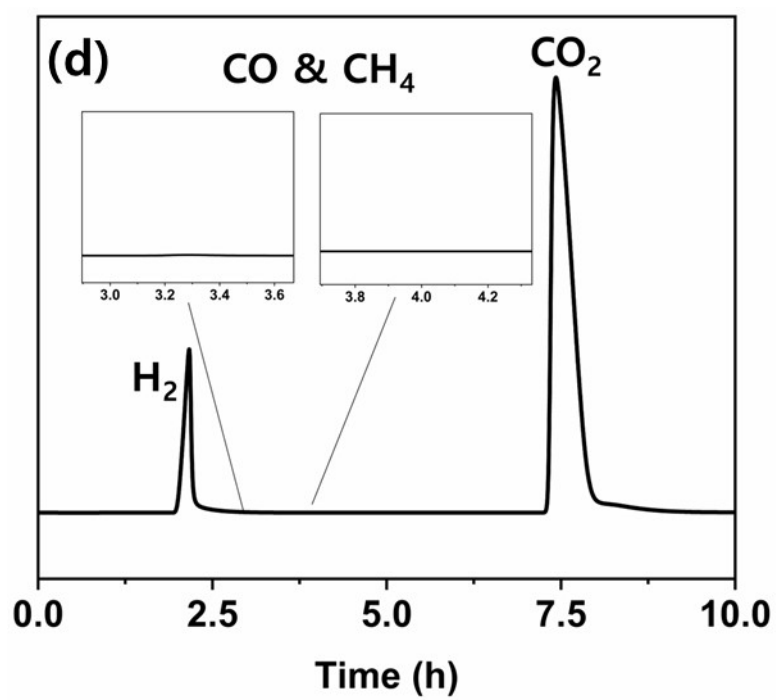

Figure S2. (a) Stainless-steel reactor employed for CO<sub>2</sub> hydrogenation. (b) Overall setup of the hydrogenation system using aqueous KOH, (c) Schematic illustration of the heterogeneous catalyst recycling procedure.

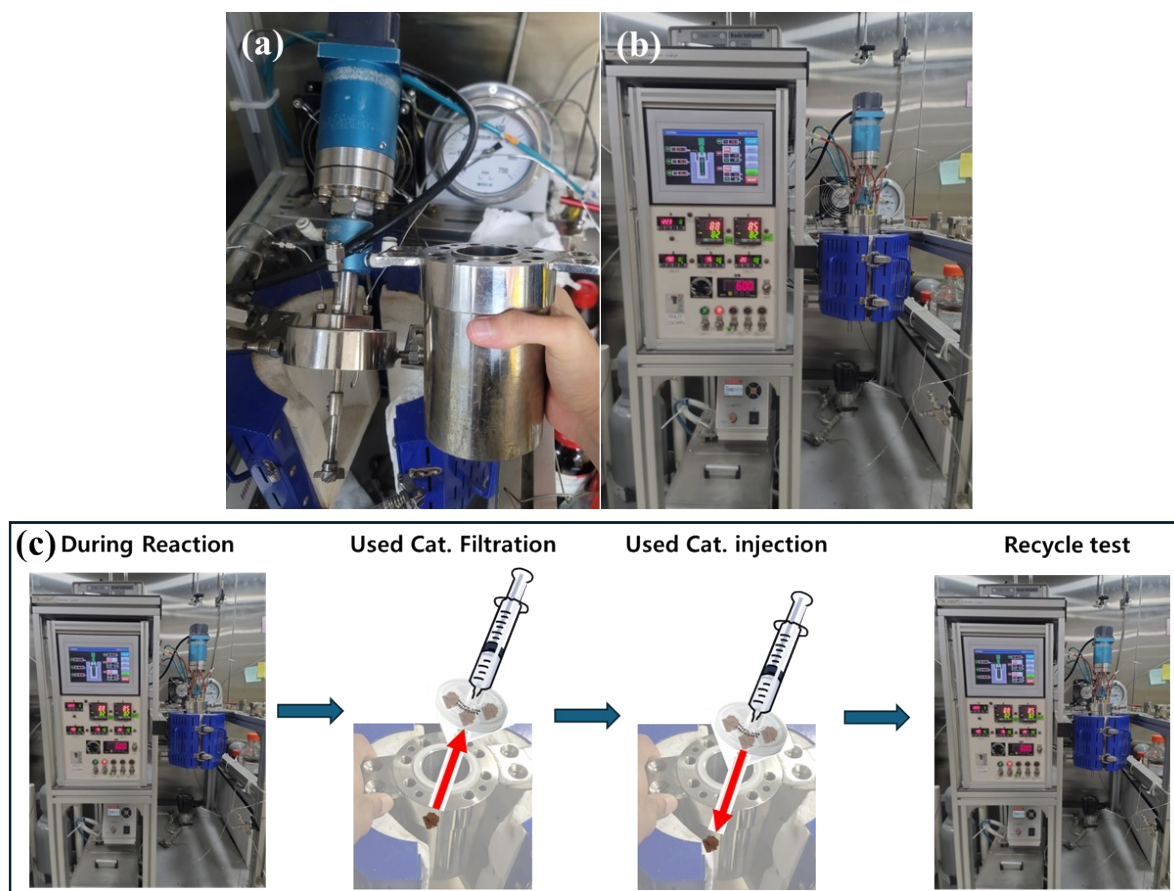

Table S1. Comparison of catalytic performance in KOH-mediated CO<sub>2</sub> hydrogenation.

| $\text{H}_2 + \text{CO}_2/\text{KOH} \xrightarrow[\Delta]{\text{Catalyst}} \text{HCO}_2\text{K} + \text{H}_2\text{O}$ |                                                              |        |          |           |
|-----------------------------------------------------------------------------------------------------------------------|--------------------------------------------------------------|--------|----------|-----------|
| Entry                                                                                                                 | Catalyst (cat.)                                              | T (°C) | Time (h) | Yield (%) |
| 1                                                                                                                     | RuNP@AC                                                      | 80     | 16       | 2.8       |
| 2                                                                                                                     | RuCl <sub>3</sub> @TN <sub>20</sub><br>Bpy <sub>1</sub> -CTF | 80     | 16       | 21        |
| 3                                                                                                                     | RuCl <sub>3</sub> @DPPE-<br>POP                              | 80     | 16       | 29        |
| 4                                                                                                                     | Ru-MACHO-<br>POMP                                            | 120    | 0.5      | 82        |
| 5                                                                                                                     | Ru-MACHO-<br>POMP                                            | 80     | 2        | 31        |
| 6                                                                                                                     | Ru-MACHO-<br>POMP                                            | 80     | 16       | >99       |

Table S2. List of abbreviations.

| Abbreviation                   | Full description                                                                       |
|--------------------------------|----------------------------------------------------------------------------------------|
| KOH                            | Potassium hydroxide                                                                    |
| H <sub>2</sub>                 | Hydrogen                                                                               |
| CO <sub>2</sub>                | Carbon dioxide                                                                         |
| CO                             | Carbon monoxide                                                                        |
| CH <sub>4</sub>                | Methane                                                                                |
| Ru                             | Ruthenium                                                                              |
| NN                             | All types of N,N-bidentate ligands                                                     |
| PP                             | All types of P,P-bidentate ligands                                                     |
| PNP                            | All types of tridentate ligands with a P–N–P sequence                                  |
| POMP                           | Porous organometallic polymer                                                          |
| Ru-MACHO-POMP                  | A heterogeneous catalyst synthesized using the Ru-MACHO homogeneous PNP-based catalyst |
| RuNP@AC                        | Ru nanoparticles supported on activated carbon                                         |
| CCU                            | Carbon capture and utilization                                                         |
| CCS                            | Carbon capture and storage                                                             |
| DACU                           | Direct Air Capture and Utilization                                                     |
| K <sub>2</sub> CO <sub>3</sub> | Potassium carbonate                                                                    |
| HCO <sub>2</sub> K             | Potassium formate                                                                      |
| C1 & C2                        | C1/C2 compounds: Molecules containing one or two carbon atoms                          |
| NMR                            | Nuclear magnetic resonance                                                             |
| ICP-OES                        | Inductively coupled plasma optical emission spectroscopy                               |
